# Supplementary material for: Preparation of functionalized magnetic nanoparticles conjugated with feroxamine and their evaluation for pathogen detection
Source: PubMed Central journal article supplement — RSC Adv. 2019 May 1;9(24):13533–42. doi: 10.1039/c8ra10440a (PMC9063908; doi:10.1039/c8ra10440a), 2019-05-01
Supplement: RA-009-C8RA10440A-s001.pdf [file RA-009-C8RA10440A-s001.pdf]

Electronic Supplementary Information

## Preparation of functionalized Magnetic Nanoparticles conjugated with feroxamine and their application for pathogen detection

**Diana Martínez-Matamoros,<sup>a</sup> Socorro Castro-García,<sup>a</sup> Miguel Balado<sup>b</sup>, Adriana Matamoros-Veloza,<sup>c</sup> Miller Alonso Camargo-Valero,<sup>d,f</sup> Oscar Cespedes,<sup>e</sup> Jaime Rodríguez,<sup>a\*</sup> Manuel L. Lemos,<sup>b</sup> and Carlos Jiménez<sup>a\*</sup>**

<sup>a</sup> *Centro de Investigaciones Científicas Avanzadas (CICA), Departamento de Química, Facultad de Ciencias, Universidade da Coruña, 15071 A Coruña, Spain*

<sup>b</sup> *Department of Microbiology and Parasitology, Institute of Aquaculture, Universidade de Santiago de Compostela, Campus Sur, Santiago de Compostela 15782, Spain*

<sup>c</sup> *Institute of Thermofluids, School of Mechanical Engineering, University of Leeds, Leeds LS2 2JT, UK*

<sup>d</sup> *BioResource Systems Research Group, School of Civil Engineering, University of Leeds, Leeds LS2 9JT, UK*

<sup>e</sup> *Faculty of Mathematics and Physical Sciences School of Physics and Astronomy, University of Leeds, Leeds, LS2 9JT, UK*

<sup>f</sup> *Departamento de Ingeniería Química, Universidad Nacional de Colombia, Campus La Nubia, Manizales, Colombia*

## Table of contents

|                                                                                                                                                                                                                                                                                                                                                 |   |
|-------------------------------------------------------------------------------------------------------------------------------------------------------------------------------------------------------------------------------------------------------------------------------------------------------------------------------------------------|---|
| <b>Figure S1.</b> Comparison of MNP ( $\text{Fe}_3\text{O}_4$ ) (blue) and magnetite pattern (black) diffractograms. ....                                                                                                                                                                                                                       | 3 |
| <b>Figure S2.</b> FT-IR spectra of $\text{MNP@SiO}_2\text{@NH}_2$ , $\text{MNP@SiO}_2\text{@NH@Fa}$ ( <b>4</b> ), $\text{MNP@SiO}_2\text{@NHBoc}$ , $\text{MNP@SiO}_2\text{@NHBoc@Fa}$ ( <b>5</b> ), $\text{MNP@SiO}_2\text{@NHCOOH}$ and $\text{MNP@SiO}_2\text{@NHCOOH@Fa}$ ( <b>6</b> ).....                                                 | 3 |
| <b>Figure S3. A)</b> Hysteresis cycle of the magnetization for the initial MNP ( $\text{Fe}_3\text{O}_4$ ), and the subsequent components added in different layers to the MNP, $\text{MNP@SiO}_2$ , $\text{MNP@SiO}_2\text{@NH}_2$ , and $\text{MNP@SiO}_2\text{@NH@Fa}$ ( <b>4</b> ) and <b>B)</b> their corresponding hysteresis loops. .... | 4 |
| <b>Figure S4.</b> Thermogravimetric analysis (TGA) of $\text{MNP@SiO}_2\text{@NH@Fa}$ ( <b>4</b> ), $\text{MNP@SiO}_2\text{@NHBoc@Fa}$ ( <b>5</b> ) and $\text{MNP@SiO}_2\text{@NHCOOH@Fa}$ ( <b>6</b> ).....                                                                                                                                   | 5 |
| <b>Figure S5.</b> SEM images of <i>Y. enterocolitica</i> WC-A interacting with $\text{MNP@SiO}_2\text{@NH@Fa}$ ( <b>4</b> ).....                                                                                                                                                                                                                | 6 |
| <b>Figure S6.</b> TEM images of <i>Y. enterocolitica</i> WC-A interacting with $\text{MNP@SiO}_2\text{@NH@Fa}$ ( <b>4</b> ). a) Attachment of nanoparticles to the surface of a single bacterial cell; b) and c) detail of the attachment at two different regions of the bacterial membrane.....                                               | 7 |
| <b>Figure S7.</b> EDX maps of <i>Y. enterocolitica</i> WC-A interacting with $\text{MNP@SiO}_2\text{@NH@Fa}$ ( <b>4</b> ).....                                                                                                                                                                                                                  | 8 |
| <b>Figure S8.</b> CFU of <i>Y. enterocolitica</i> WC-A (wild type) captured per 100 $\mu\text{g}$ of magnetic nanoparticles in iron and iron deficiency growth conditions. ....                                                                                                                                                                 | 9 |
| <b>Figure S9.-</b> Attraction of the conjugate $\text{MNP@SiO}_2\text{@NH@Fa}$ ( <b>4</b> ) in solution in the presence of a magnet.....                                                                                                                                                                                                        | 9 |

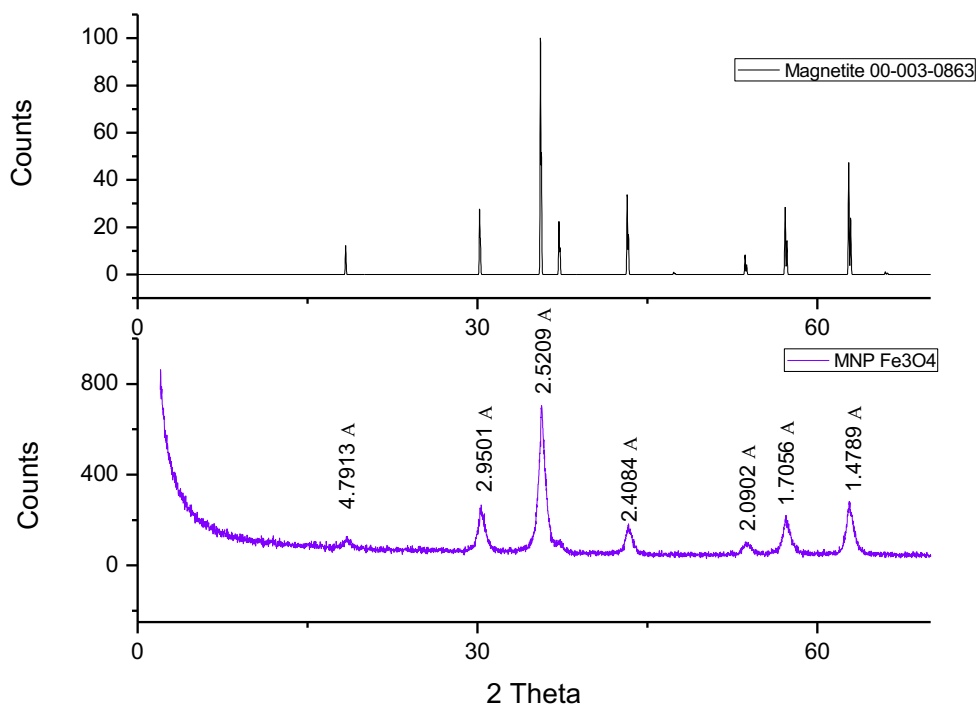

**Figure S1.** Comparison of MNP ( $\text{Fe}_3\text{O}_4$ ) (blue) and magnetite pattern (black) diffractograms.

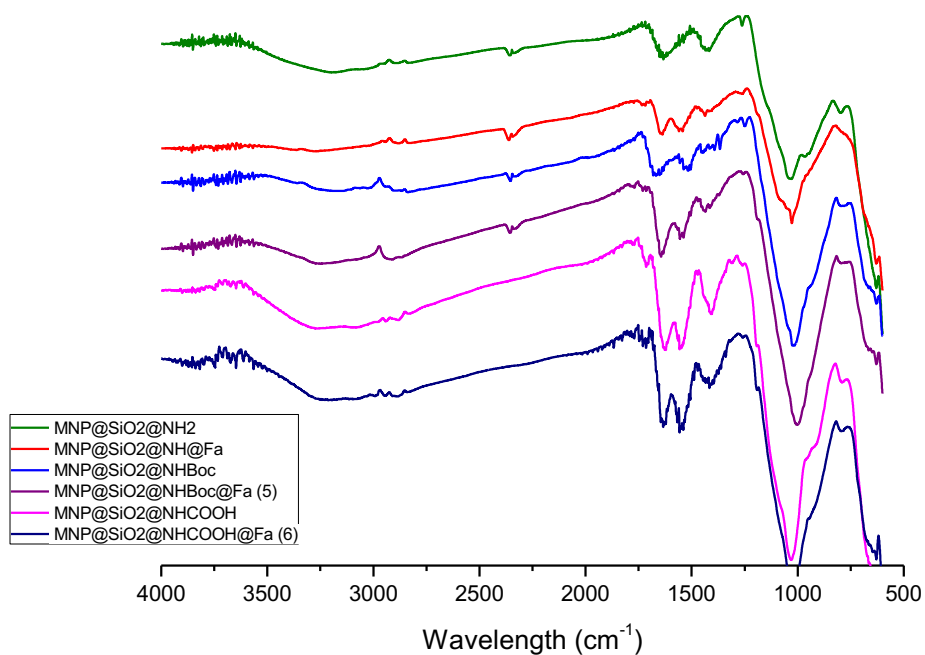

**Figure S2.** FT-IR spectra of MNP@SiO<sub>2</sub>@NH<sub>2</sub>, MNP@SiO<sub>2</sub>@NH@Fa (4), MNP@SiO<sub>2</sub>@NHBoc, MNP@SiO<sub>2</sub>@NHBoc@Fa (5), MNP@SiO<sub>2</sub>@NHCOOH and MNP@SiO<sub>2</sub>@NHCOOH@Fa (6).

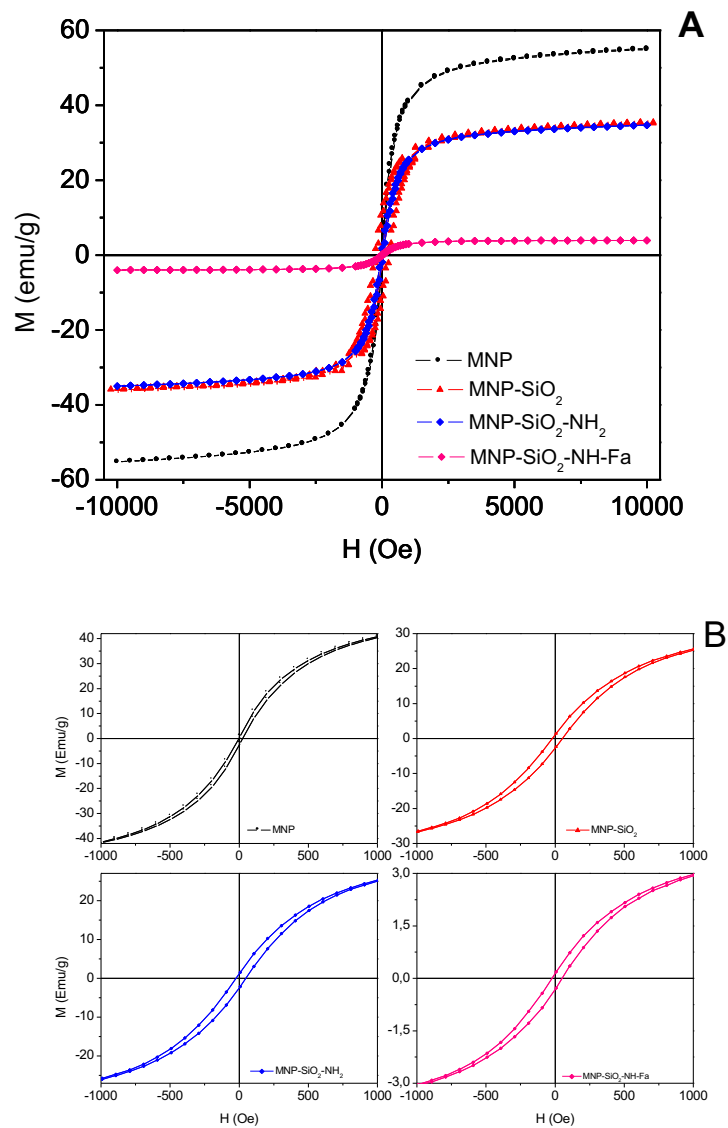

**Figure S3. A)** Hysteresis cycle of the magnetization for the initial MNP ( $\text{Fe}_3\text{O}_4$ ), and the subsequent components added in different layers to the MNP,  $\text{MNP@SiO}_2$ ,  $\text{MNP@SiO}_2\text{@NH}_2$ , and  $\text{MNP@SiO}_2\text{@NH@Fa}$  (**4**) and **B)** their corresponding hysteresis loops.

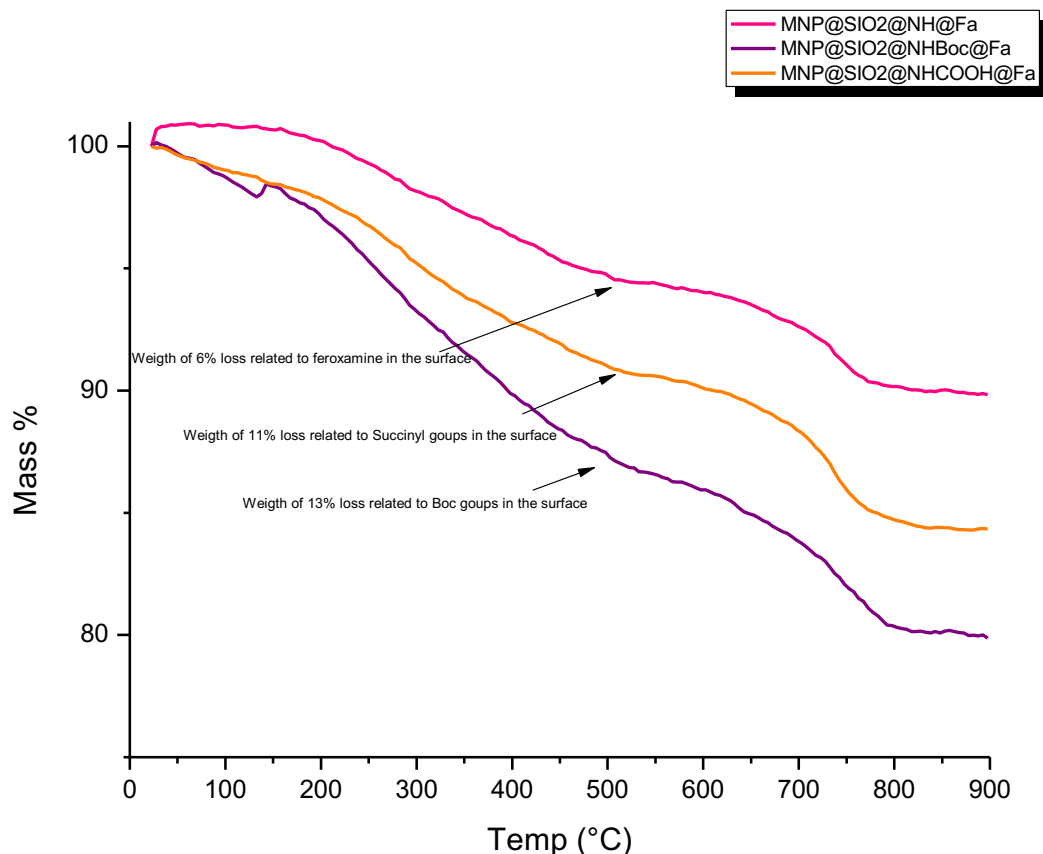

**Figure S4.** Thermogravimetric analysis (TGA) of MNP@SiO<sub>2</sub>@NH@Fa (4), MNP@SiO<sub>2</sub>@NHBoc@Fa (5) and MNP@SiO<sub>2</sub>@NHCOOH@Fa (6).

Estimation of feroxamine bonded to a 1 mg of MNP@SiO<sub>2</sub>@NH<sub>2</sub>:

**Weight loss of MNP@SiO<sub>2</sub>@NH<sub>2</sub> = 5.6 %**

**Weight loss of MNP@SiO<sub>2</sub>@NH@Fa = 11.1 %**

**Expected Weight loss for MNP@SiO<sub>2</sub>@NH@Fa:**

$$= (\% \text{ Wt loss of MNP@SiO}_2\text{@NH@Fa}) - (\% \text{ Wt loss of MNP@SiO}_2\text{@NH}_2)$$

$$= (11.1 - 5.6) \% = \mathbf{5.44\%}$$

**Weight loss of feroxamine from 1 mg of conjugate:**

$$1\text{mg} \frac{5.44 \% \text{ of feroxamine}}{100} = 0.0544 \text{ mg of feroxamine}$$

$$\frac{5.44 \times 10^{-3} \text{ g}}{713.98 \text{ mg /mmol}} = 7.62 \times 10^{-5} \text{ mmol of feroxamine}$$

The amount of feroxamine per mg of MNP@SiO<sub>2</sub>@NH<sub>2</sub> is 0.0544 mg, approximately. The conjugation was carried out using an excess of feroxamine to ensure that several amine groups were successfully coupled to the siderophore.

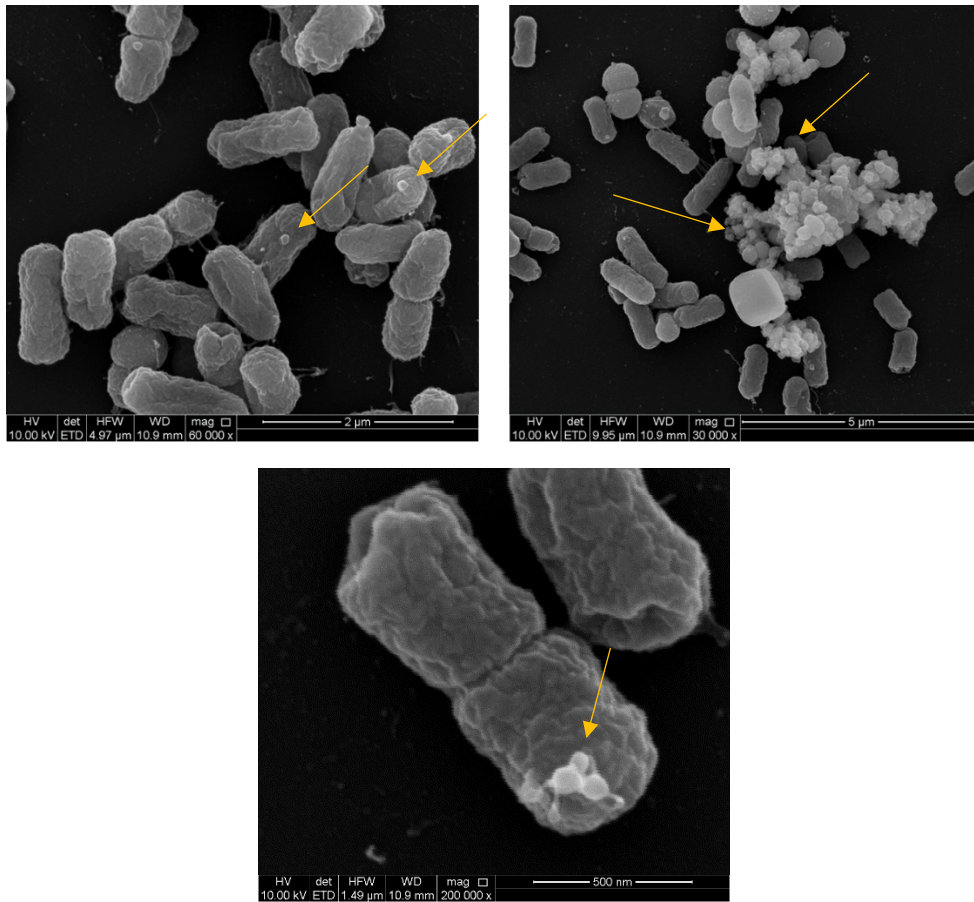

**Figure S5.** SEM images of *Y. enterocolitica* WC-A interacting with MNP@SiO<sub>2</sub>@NH@Fa (4).

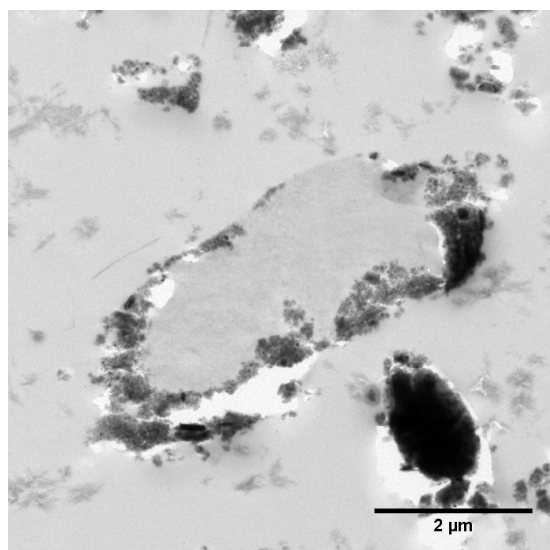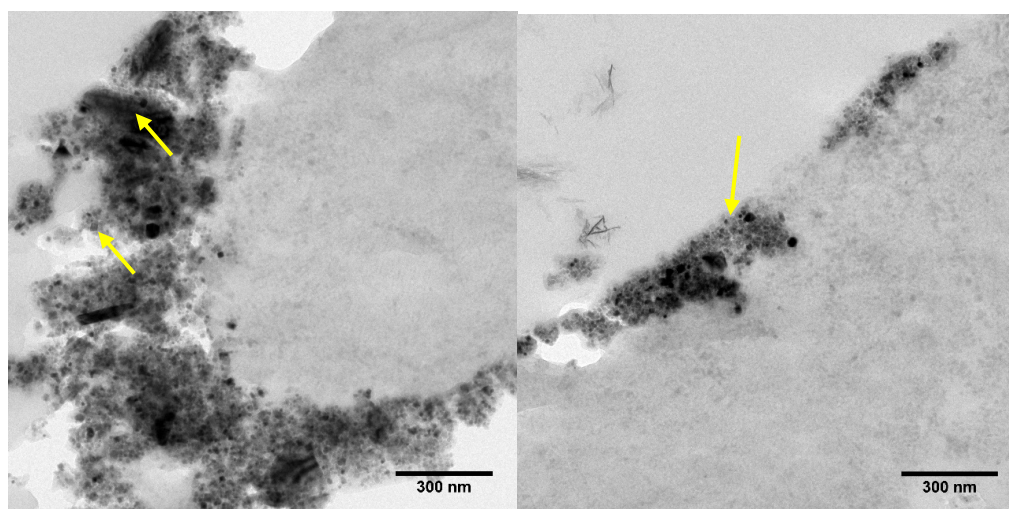

**Figure S6.** TEM images of *Y. enterocolitica* WC-A interacting with MNP@SiO<sub>2</sub>@NH@Fa (4). a) Attachment of nanoparticles to the surface of a single bacterial cell; b) and c) detail of the attachment at two different regions of the bacterial membrane.

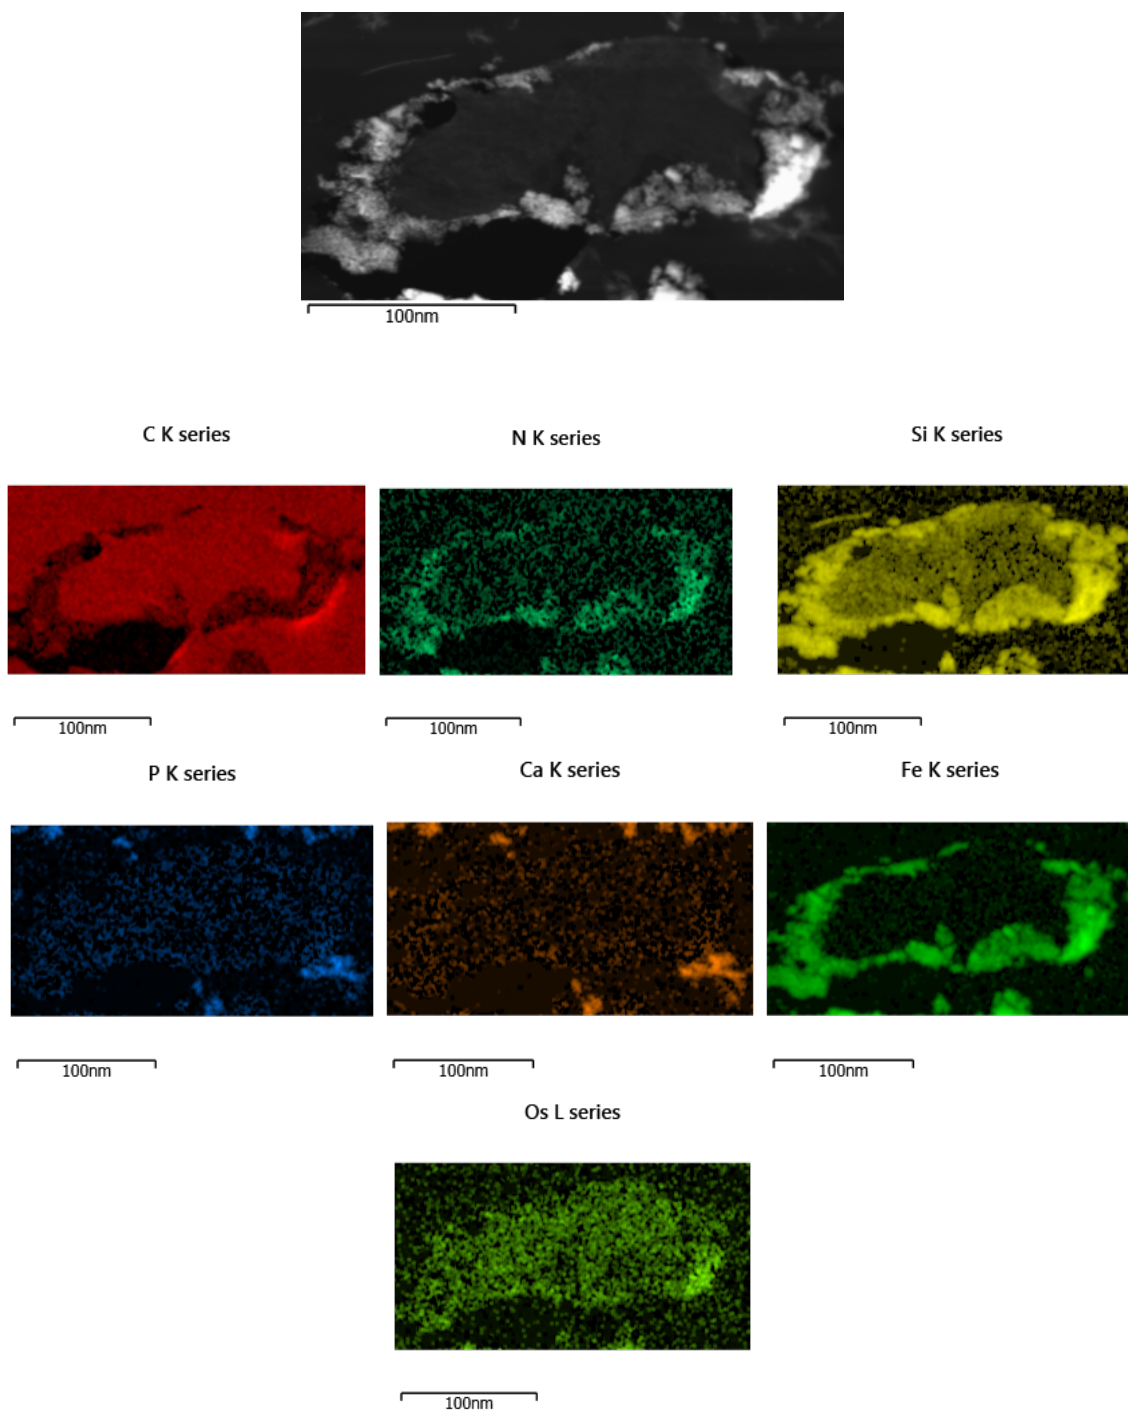

**Figure S7.** EDX maps of *Y. enterocolitica* WC-A interacting with MNP@SiO<sub>2</sub>@NH@Fa (4).



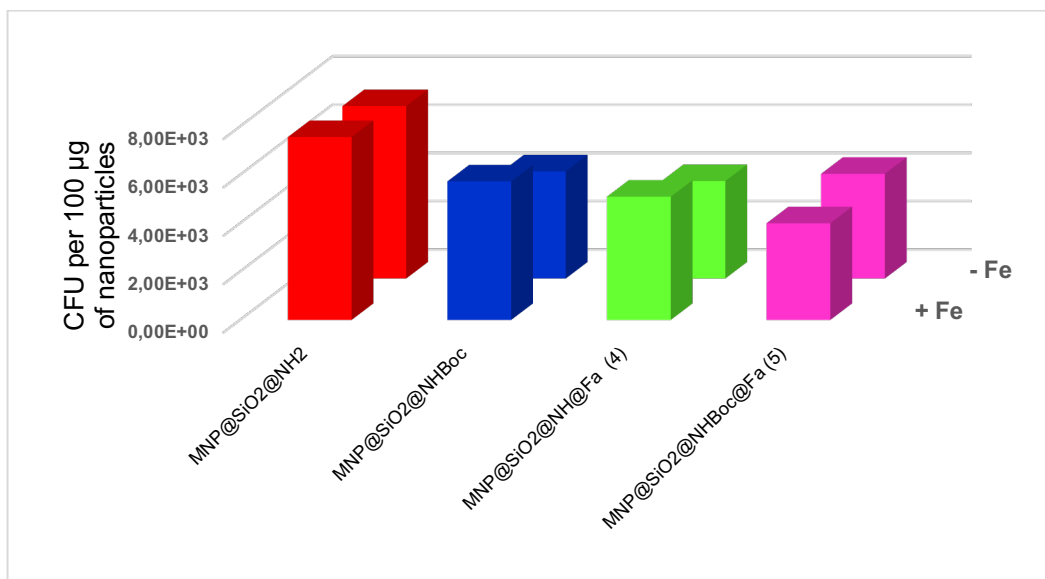

**Figure S8.** CFU of *Y. enterocolitica* WC-A (wild type) captured per 100 µg of magnetic nanoparticles in iron and iron deficiency growth conditions.

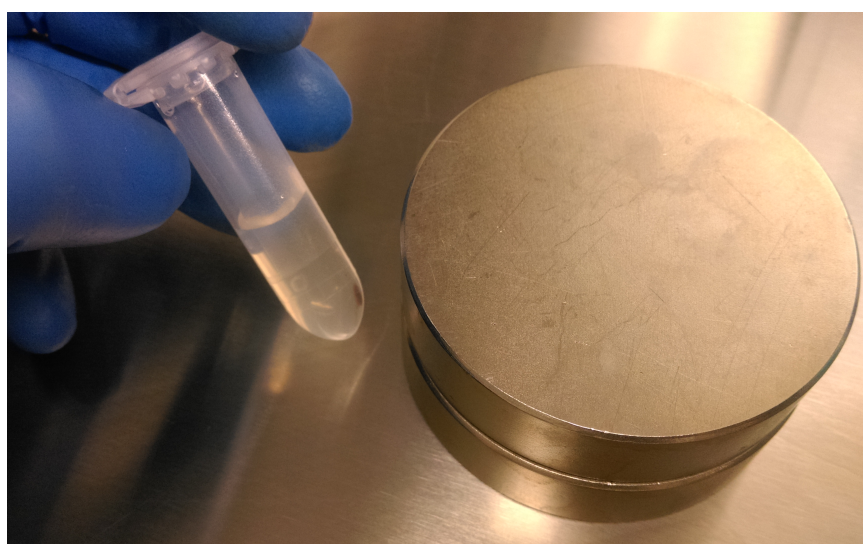

**Figure S9.** Attraction of the conjugate MNP@SiO<sub>2</sub>@NH@Fa (4) in solution in the presence of a magnet.
